# Supplementary material
Source: MDPI journal article supplement (https://www.mdpi.com/2072-6694/14/24/6120)
Supplement: s1 [file s1]

Archive with 1 entries (1 files):
- cancers-1750378-supplementary.pdf
